# Supplementary material for: Construction of Genetic Map and QTL Mapping for Seed Size and Quality Traits in Soybean (Glycine max L.)
Source: MDPI journal article supplement (doi:10.3390/ijms25052857), 2024-03-01
Supplement: s1 [file s1]

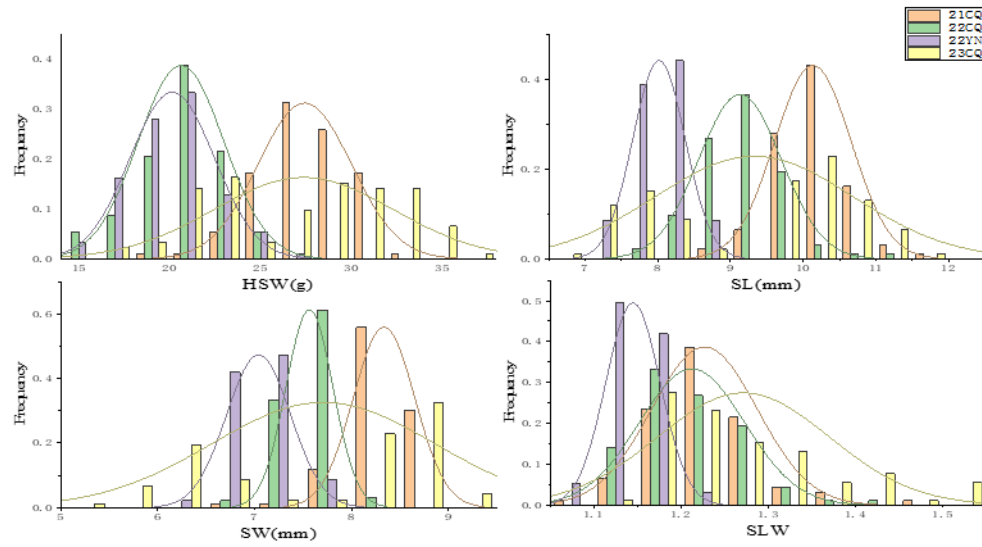

**FIGURE S1 Frequency distributions of seed size traits in four environments.**

HSW, hundred-grain weight (g); SL, seed length (mm); SW, seed width (mm); SLW, seed length-to-width ratio.

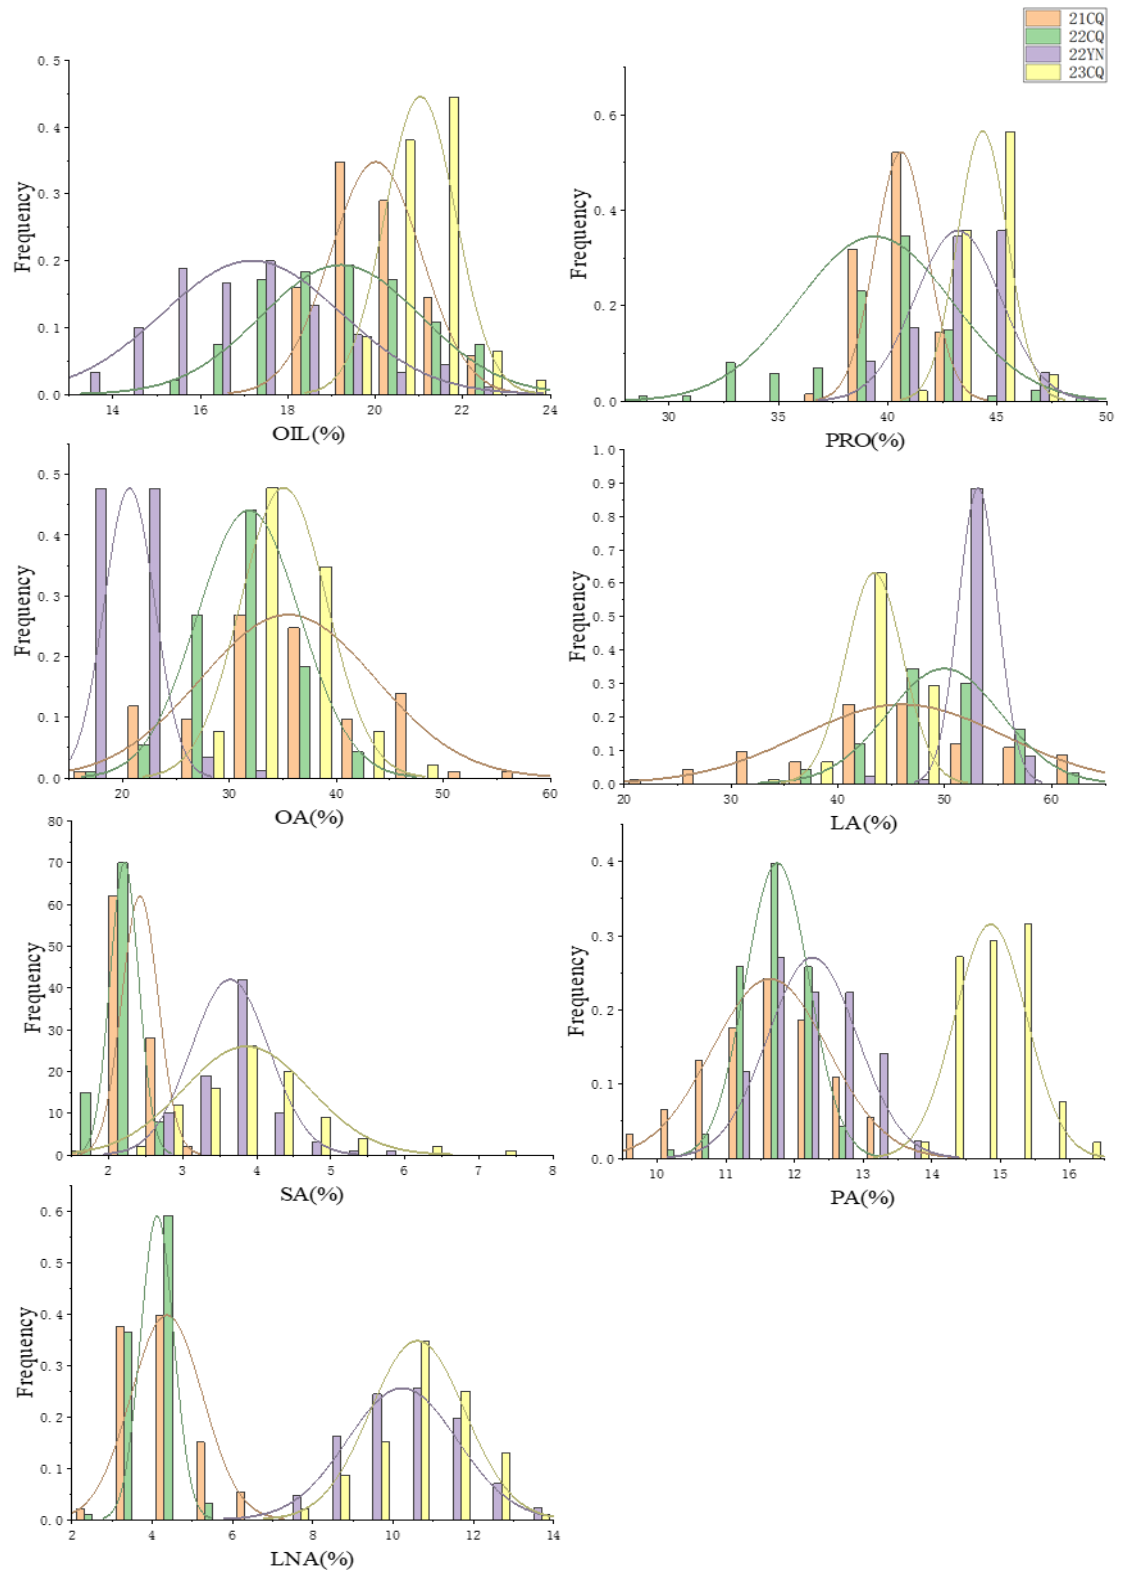

**FIGURE S2 Frequency distributions of seed quality traits in four environments.**

OIL: Oil content, PRO: Protein content, OA: oleic, LA: Linoleic acid, LNA: Linolenic acid, PA: palmitic acid, SA: stearic acid.
